# Supplementary material for: Photophysical properties of betaxanthins: miraxanthin V – insight into the excited-state deactivation mechanism from experiment and computations
Source: Royal Society of Chemistry journal article supplement (doi:10.1039/c6ra28110a), 2017-01-01

## Electronic Supplementary Information

### **Photophysical properties of betaxanthins: miraxanthin V – insight into the excited-state deactivation mechanism from the experiment and computations.**

Stanisław Niziński,<sup>a</sup> Monika Wendel,<sup>a</sup> Michał F. Rode,<sup>\*b</sup> Dorota Prukała,<sup>c</sup> Marek Sikorski,<sup>c</sup>  
Sławomir Wybraniec<sup>d</sup> and Gotard Burdziński<sup>\*a</sup>

<sup>a</sup> Quantum Electronics Laboratory, Faculty of Physics, Adam Mickiewicz University in Poznań,  
Umultowska 85, Poznan, 61-614, Poland

<sup>b</sup> Institute of Physics, Polish Academy of Sciences, Aleja Lotników 32/46, 02-668 Warsaw, Poland

<sup>c</sup> Faculty of Chemistry, Adam Mickiewicz University in Poznań, Umultowska 89b, 61-614 Poznań, Poland

<sup>d</sup> Faculty of Chemical Engineering and Technology, Institute C-1, Section of Analytical Chemistry,  
Cracow University of Technology, Warszawska 24, 31-155 Cracow, Poland

\* gotarbd@amu.edu.pl, mrode@ifpan.edu.pl

**Table S1.** (A) Vertical excitation energies ( $\Delta E$ ), oscillator strengths ( $f$ ) of the low-energy singlet excited states of miraxanthin V calculated with the B3LYP/aug-cc-pVDZ method at the geometries optimized for the ground electronic state at the B3LYP/cc-pVDZ level for the two stereoisomeric forms: **EE** and **ZE** (in vacuum, methanol and water). (B)  $\Delta E$  for the dominant **EE** stereoisomer of miraxanthin V calculated at the B3LYP/6-311++G(3df,3pd) level of theory with polarizable continuum model (PCM) for water and methanol, for comparison.

(A)

|                                                                              | $\Delta E$ [eV] | $f$    | $\Delta E$ [nm] | $\mu$ [D] |
|------------------------------------------------------------------------------|-----------------|--------|-----------------|-----------|
| <b>EE, in vacuum, <math>\epsilon=1.00</math>, <math>n=1.00</math></b>        |                 |        |                 |           |
| <b>S<sub>0</sub></b>                                                         | <b>0.00</b>     |        |                 | 2.1       |
| <b>S<sub>1</sub>(<math>\pi \rightarrow \pi^*</math>)</b>                     | 3.09            | 0.2006 | 401             |           |
| <b>S<sub>2</sub>(<math>\pi \rightarrow \pi^*</math>)</b>                     | 3.29            | 0.5252 | 377             |           |
| <b>S<sub>3</sub>(<math>n \rightarrow \pi^*</math>)</b>                       | 3.76            | 0.0067 | 330             |           |
| <b>S<sub>4</sub>(<math>n \rightarrow \pi^*</math>)</b>                       | 3.94            | 0.0004 | 315             |           |
| <b>S<sub>5</sub>(<math>n \rightarrow \pi^*</math>)</b>                       | 4.05            | 0.0035 | 306             |           |
| <b>S<sub>6</sub>(<math>\pi \rightarrow \pi^*</math>)</b>                     | 4.44            | 0.0124 | 279             |           |
| <b>EE, in methanol, <math>\epsilon=32.613</math>, <math>n=1.33141</math></b> |                 |        |                 |           |
| <b>S<sub>0</sub></b>                                                         | <b>0.00</b>     |        |                 | 3.21      |
| <b>S<sub>1</sub>(<math>\pi \rightarrow \pi^*</math>)</b>                     | 3.08            | 0.6628 | 403             |           |
| <b>S<sub>2</sub>(<math>\pi \rightarrow \pi^*</math>)</b>                     | 3.23            | 0.1432 | 384             |           |
| <b>S<sub>3</sub>(<math>n \rightarrow \pi^*</math>)</b>                       | 3.92            | 0.0025 | 316             |           |
| <b>S<sub>4</sub>(<math>n \rightarrow \pi^*</math>)</b>                       | 3.97            | 0.0014 | 313             |           |
| <b>S<sub>5</sub>(<math>n \rightarrow \pi^*</math>)</b>                       | 4.29            | 0.0005 | 289             |           |
| <b>S<sub>6</sub>(<math>\pi \rightarrow \pi^*</math>)</b>                     | 4.42            | 0.0219 | 280             |           |
| <b>EE, in water, <math>\epsilon=78.3553</math>, <math>n=1.330</math></b>     |                 |        |                 |           |
| <b>S<sub>0</sub></b>                                                         | <b>0.00</b>     |        |                 | 3.25      |
| <b>S<sub>1</sub>(<math>\pi \rightarrow \pi^*</math>)</b>                     | 3.08            | 0.6665 | 401             |           |
| <b>S<sub>2</sub>(<math>\pi \rightarrow \pi^*</math>)</b>                     | 3.23            | 0.1394 | 383             |           |
| <b>S<sub>3</sub>(<math>n \rightarrow \pi^*</math>)</b>                       | 3.93            | 0.0023 | 316             |           |
| <b>S<sub>4</sub>(<math>n \rightarrow \pi^*</math>)</b>                       | 3.97            | 0.0015 | 313             |           |
| <b>S<sub>5</sub>(<math>n \rightarrow \pi^*</math>)</b>                       | 4.30            | 0.0005 | 288             |           |
| <b>S<sub>6</sub>(<math>\pi \rightarrow \pi^*</math>)</b>                     | 4.42            | 0.0222 | 281             |           |
| <b>ZE, in vacuum, <math>\epsilon=1.00</math>, <math>n=1.00</math></b>        |                 |        |                 |           |
| <b>S<sub>0</sub></b>                                                         | <b>+0.17</b>    |        |                 | 3.84      |
| <b>S<sub>1</sub>(<math>\pi \rightarrow \pi^*</math>)</b>                     | 2.94            | 0.0655 | 422             |           |
| <b>S<sub>2</sub>(<math>\pi \rightarrow \pi^*</math>)</b>                     | 3.27            | 0.5354 | 379             |           |
| <b>S<sub>3</sub>(<math>\pi \rightarrow \pi^*</math>)</b>                     | 3.40            | 0.0610 | 365             |           |
| <b>S<sub>4</sub>(<math>n \rightarrow \pi^*</math>)</b>                       | 3.78            | 0.0002 | 328             |           |
| <b>S<sub>5</sub>(<math>n \rightarrow \pi^*</math>)</b>                       | 4.09            | 0.0023 | 303             |           |
| <b>S<sub>6</sub>(<math>\pi \rightarrow \pi^*</math>)</b>                     | 4.45            | 0.0242 | 279             |           |
| <b>ZE, in methanol, <math>\epsilon=32.613</math>, <math>n=1.33141</math></b> |                 |        |                 |           |
| <b>S<sub>0</sub></b>                                                         | <b>+0.20</b>    |        |                 | 5.38      |
| <b>S<sub>1</sub>(<math>\pi \rightarrow \pi^*</math>)</b>                     | 3.04            | 0.3875 | 407             |           |
| <b>S<sub>2</sub>(<math>\pi \rightarrow \pi^*</math>)</b>                     | 3.17            | 0.3378 | 391             |           |
| <b>S<sub>3</sub>(<math>n \rightarrow \pi^*</math>)</b>                       | 3.63            | 0.0053 | 341             |           |
| <b>S<sub>4</sub>(<math>n \rightarrow \pi^*</math>)</b>                       | 3.88            | 0.0005 | 319             |           |
| <b>S<sub>5</sub>(<math>n \rightarrow \pi^*</math>)</b>                       | 4.30            | 0.0004 | 289             |           |
| <b>S<sub>6</sub>(<math>\pi \rightarrow \pi^*</math>)</b>                     | 4.42            | 0.0238 | 281             |           |
| <b>ZE, in water, <math>\epsilon=78.3553</math>, <math>n=1.330</math></b>     |                 |        |                 |           |
| <b>S<sub>0</sub></b>                                                         | <b>+0.20</b>    |        |                 | 5.44      |
| <b>S<sub>1</sub>(<math>\pi \rightarrow \pi^*</math>)</b>                     | 3.05            | 0.4082 | 407             |           |
| <b>S<sub>2</sub>(<math>\pi \rightarrow \pi^*</math>)</b>                     | 3.17            | 0.3166 | 390             |           |
| <b>S<sub>3</sub>(<math>n \rightarrow \pi^*</math>)</b>                       | 3.64            | 0.0052 | 341             |           |
| <b>S<sub>4</sub>(<math>n \rightarrow \pi^*</math>)</b>                       | 3.89            | 0.0005 | 319             |           |
| <b>S<sub>5</sub>(<math>n \rightarrow \pi^*</math>)</b>                       | 4.31            | 0.0004 | 288             |           |
| <b>S<sub>6</sub>(<math>\pi \rightarrow \pi^*</math>)</b>                     | 4.42            | 0.0234 | 281             |           |

(B)

| <b>EE, in vacuum</b>   |        |                 |
|------------------------|--------|-----------------|
|                        | $f$    | $\Delta E$ [nm] |
| <b>S<sub>1</sub></b>   | 0.3678 | 384             |
| <b>S<sub>2</sub></b>   | 0.3521 | 374             |
| <b>S<sub>3</sub></b>   | 0.0090 | 333             |
| <b>EE, in methanol</b> |        |                 |
|                        | $f$    | $\Delta E$ [nm] |
| <b>S<sub>1</sub></b>   | 0.7549 | 395             |
| <b>S<sub>2</sub></b>   | 0.0499 | 377             |
| <b>S<sub>3</sub></b>   | 0.0061 | 323             |
| <b>EE, in water</b>    |        |                 |
|                        | $f$    | $\Delta E$ [nm] |
| <b>S<sub>1</sub></b>   | 0.7589 | 395             |
| <b>S<sub>2</sub></b>   | 0.0474 | 377             |
| <b>S<sub>3</sub></b>   | 0.0061 | 323             |

**Table S2.** Comparison of some important features of miraxanthin V, indicaxanthin and vulgaxanthin I in water.

| Dye            | $\tau_1, \tau_2$ [ps] | $\Phi_f$ [ $\times 10^{-3}$ ] | Stokes shift [ $\text{cm}^{-1}$ ] | $\lambda_{\text{abs}}^{\text{max}} S_1 \rightarrow S_n$ [nm] |
|----------------|-----------------------|-------------------------------|-----------------------------------|--------------------------------------------------------------|
| miraxanthin V  | 4.2, 24.2             | 3                             | 1528                              | 394                                                          |
| indicaxanthin  | 4.8, 27               | 5.3                           | 1270                              | 395                                                          |
| vulgaxanthin I | 2.9, 37               | 7.3                           | 1600                              | 392                                                          |

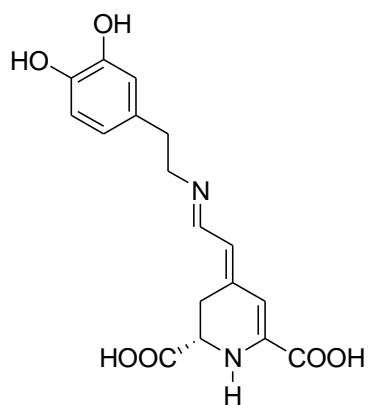

miraxanthin V

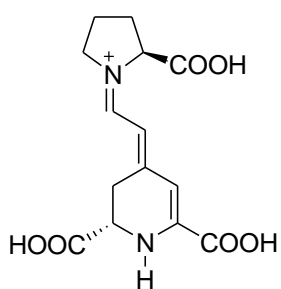

indicaxanthin

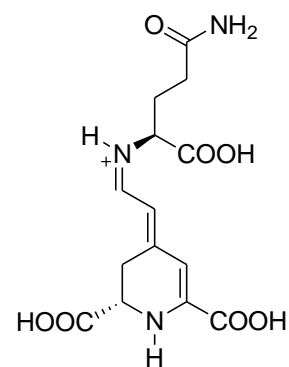

vulgaxanthin I

**Table S3.** Vertical excitation energies ( $\Delta E$ , in eV), oscillator strengths ( $f(S_0 \rightarrow S_n)$ ,  $n \geq 1$ ) and dipole moments ( $\mu$ , in Debye) of miraxanthin V calculated with the ADC2/cc-pVDZ method at the MP2/cc-pVDZ ground-state equilibrium geometries.

|                                                            | $\Delta E$ [eV] | $f(S_0 \rightarrow S_n)$ | $\mu$ [D] |
|------------------------------------------------------------|-----------------|--------------------------|-----------|
| <b><i>EE</i></b>                                           |                 |                          |           |
| <b>S<sub>0</sub></b>                                       | 0.00            |                          | 2.8       |
| <b>S<sub>1</sub>(<math>\pi \rightarrow \pi_A^*</math>)</b> | 3.70            | 0.750                    | 4.9       |
| <b>S<sub>2</sub>(<math>n \rightarrow \pi_A^*</math>)</b>   | 4.37            | 0.010                    | 6.5       |
| <b>S<sub>3</sub>(<math>\pi \rightarrow \pi_D^*</math>)</b> | 4.80            | 0.083                    | 2.9       |
| <b>S<sub>4</sub>(<math>n\pi^*</math>)</b>                  | 4.87            | 0.0003                   | 6.2       |
| <b>S<sub>5</sub>(<math>\pi\pi^*</math>)</b>                | 5.10            | 0.108                    | 24.2      |
| <b>S<sub>6</sub>(<math>\pi\pi^*</math>)</b>                | 5.35            | 0.099                    | 6.8       |
| <b><i>ZE</i></b>                                           |                 |                          |           |
| <b>S<sub>0</sub></b>                                       | +0.16           |                          | 3.4       |
| <b>S<sub>1</sub>(<math>\pi \rightarrow \pi_A^*</math>)</b> | 3.68            | 0.700                    | 5.9       |
| <b>S<sub>2</sub>(<math>n \rightarrow \pi_A^*</math>)</b>   | 3.95            | 0.011                    | 6.4       |
| <b>S<sub>3</sub>(<math>\pi_D\pi_D^*</math>)</b>            | 4.77            | 0.087                    | 7.6       |
| <b>S<sub>4</sub>(<math>n\pi^*</math>)</b>                  | 4.84            | 0.008                    | 5.5       |
| <b>S<sub>5</sub>(<math>n\pi^*</math>)</b>                  | 4.90            | 0.005                    | 15.5      |
| <b>S<sub>6</sub>(<math>\pi\pi^*</math>)</b>                | 5.29            | 0.145                    | 4.5       |

**Table S4.** Determined data for temperature-dependent transient absorption experiments of miraxanthin V in MeOH.

| T [K] | Global analysis |               | PBI           |               |                 |                 | NBI           |               |                 |                 |
|-------|-----------------|---------------|---------------|---------------|-----------------|-----------------|---------------|---------------|-----------------|-----------------|
|       | $\tau_1$ [ps]   | $\tau_2$ [ps] | $\tau_1$ [ps] | $\tau_2$ [ps] | $A_1/(A_1+A_2)$ | $A_2/(A_1+A_2)$ | $\tau_1$ [ps] | $\tau_2$ [ps] | $A_1/(A_1+A_2)$ | $A_2/(A_1+A_2)$ |
| 182   | 15.4            | 219           | 38.7          | 297           | 0.39            | 0.61            | 37.8          | 296           | 0.38            | 0.62            |
| 195   | 9.4             | 153           | 30.1          | 218           | 0.4             | 0.6             | 31.4          | 229           | 0.41            | 0.59            |
| 205   | 7.5             | 120           | 20.2          | 155           | 0.38            | 0.62            | 22.6          | 166           | 0.39            | 0.61            |
| 206   | 6.5             | 110           | 18.1          | 137           | 0.22            | 0.78            | 17.5          | 140           | 0.38            | 0.62            |
| 220   | 5.2             | 83            | 15.5          | 105           | 0.37            | 0.63            | 21.7          | 123           | 0.43            | 0.57            |
| 222   | 5.2             | 81            | 14.4          | 96            | 0.36            | 0.64            | 16.2          | 106           | 0.38            | 0.62            |
| 238   | 4.2             | 59            | 10.3          | 67            | 0.33            | 0.67            | 7.5           | 67            | 0.31            | 0.69            |
| 239   | 3.0             | 58            | 10.2          | 69            | 0.32            | 0.68            | 14.4          | 79            | 0.37            | 0.63            |
| 249   | 3.1             | 44            | 9.2           | 55            | 0.34            | 0.66            | 16.5          | 70            | 0.47            | 0.53            |
| 260   | 2.1             | 40            | 11.4          | 55            | 0.37            | 0.63            | 11.9          | 60            | 0.41            | 0.59            |
| 269   | 2.7             | 32.4          | 7.7           | 41            | 0.36            | 0.64            | 8.7           | 43            | 0.4             | 0.6             |
| 285   | 2.3             | 25.5          | 5.8           | 30.4          | 0.31            | 0.69            | 7             | 34.2          | 0.39            | 0.61            |
| 286   | 1.9             | 29.2          | 4.8           | 33.4          | 0.32            | 0.68            | 5.8           | 37.4          | 0.35            | 0.65            |
| 295   | 1.4             | 20.9          | 5.8           | 27.6          | 0.3             | 0.7             | 7             | 31.3          | 0.39            | 0.61            |

**Table S5.** The most relevant HF/cc-pVDZ molecular orbitals involved in the  $S_0 \rightarrow S_1$  transition determined for miraxanthin V at the equilibrium geometry of the ground state  $S_0$  for the **EE** form (left panel) and for the **ZE** form (right).

|                  | $S_0$ - <b>EE</b>                                                                              |                                                                                                | $S_0$ - <b>ZE</b>                                                                                |                                                                                                  |
|------------------|------------------------------------------------------------------------------------------------|------------------------------------------------------------------------------------------------|--------------------------------------------------------------------------------------------------|--------------------------------------------------------------------------------------------------|
| LUMO ( $\pi^*$ ) | <br>LUMO (92) |                                                                                                | <br>LUMO (92) |                                                                                                  |
| HOMO ( $\pi$ )   | <br>HOMO (90) | <br>HOMO (91) | <br>HOMO (90)  | <br>HOMO (91) |
|                  | $= +0.86 (91a_{92a}) - 0.32 (90a_{92a})$<br>(75 %) + (10 %)                                    |                                                                                                | $= +0.72 (91a_{92a}) - 0.57 (90a_{92a})$<br>(66 %) + (18 %)                                      |                                                                                                  |

**Table S6.** Comparison of the geometric parameters (bond lengths, in Å), adiabatic energies ( $E_a$ , in eV), dipole moments ( $\mu$ , in Debye) and oscillator strength ( $f(S_1 \rightarrow S_0)$ ) for the equilibrium ground state ( $S_0$ ) and the excited state ( $S_1$ ) geometries optimized at the MP2/cc-pVDZ (for  $S_0$ ) and the ADC2/cc-pVDZ (for  $S_1$ ) levels of theory. The fluorescence energy ( $E_f$ , in eV) and oscillator strength  $f(S_1 \rightarrow S_0)$  are given for the  $S_1$ -state.

|                                                                                                         | $C_8-N_9$ | $C_{10}=N_9$ | $C_{10}-C_{11}$ | $C_{11}=C_{12}$ | $E_a$ [eV] | $E_f$ [eV] | $\mu$ [D] | $f(S_1 \rightarrow S_0)$ |
|---------------------------------------------------------------------------------------------------------|-----------|--------------|-----------------|-----------------|------------|------------|-----------|--------------------------|
| $S_0.EZ$                                                                                                | 1.456     | 1.298        | 1.456           | 1.374           | 0.04       |            | 3.6       |                          |
| $S_1.EZ. \pi\pi^*$<br> | 1.449     | 1.316        | 1.429           | 1.418           | 3.43       | 3.08       | 6.8       | 0.5539                   |

Even though the **EE** and **ZE** forms were found to constitute the  $S_0$ -state equilibrium in experimental conditions, and other forms have much smaller contributions, one may try to optimize other stable conformers. One of them is the **EZ** form, which is a stereoisomer of the **EE** form with respect to the rotation about the C=C bond. Its geometry was optimized both in the ground and in the excited  $\pi\pi^*$ -state (see Table above). Both the ground and the excited-state geometry of the **EZ** form are found to be similar to the respective **EE** forms. The excited-state forms of both stereoisomers have similar photophysical properties, such as fluorescence energy, and are isoenergetic. That's why it can be assumed that the photophysics of those forms would be also similar.

**Table S7.** The most relevant HF/cc-pVDZ molecular orbitals involved in the  $S_1 \rightarrow S_0$  nonadiabatic transition determined for miraxanthin V at the exemplary conical intersection geometry between the excited state,  $S_1$ , and the ground electronic state,  $S_0$ .

|                   |                                                                                                  |                 |                                                                                                       |                |
|-------------------|--------------------------------------------------------------------------------------------------|-----------------|-------------------------------------------------------------------------------------------------------|----------------|
|                   | CI( $S_1/S_0$ )                                                                                  |                 |                                                                                                       |                |
| LUMO ( $\pi^*$ )  | 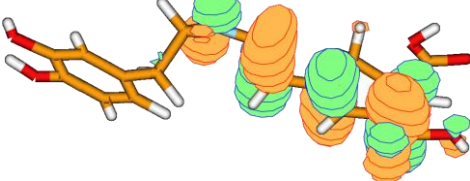               |                 |                                                                                                       |                |
|                   | LUMO (92) $\pi^*$                                                                                |                 |                                                                                                       |                |
| HOMO (n / $\pi$ ) | <br>HOMO (88) n |                 | <br>HOMO (91) $\pi$ |                |
|                   | =                                                                                                | +0.77 (88a_92a) | +                                                                                                     | 0.51 (91a_92a) |
|                   | =                                                                                                | (61 %)          | +                                                                                                     | (26 %)         |



**Figure S1.** (A) Normalized fluorescence spectrum of miraxanthin V in H<sub>2</sub>O ( $\lambda_{\text{exc}} = 470 \text{ nm}$ ) obtained with larger 2 mm excitation and emission slits to improve signal-to-noise ratio. For a comparison, the reference data obtained in pure H<sub>2</sub>O are also shown to indicate Raman contribution at  $\lambda \approx 562 \text{ nm}$ . The fluorescence spectrum is weakly affected by Raman contribution, the corrected fluorescence spectrum is very close to uncorrected data. (B) Normalized absorption and fluorescence excitation spectra ( $\lambda_f = 520 \text{ nm}$ ) of miraxanthin V in aqueous solution.

(A)

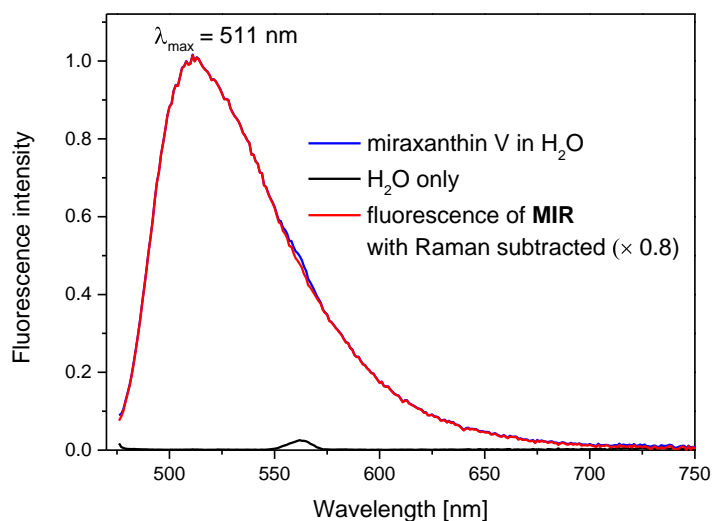

(B)

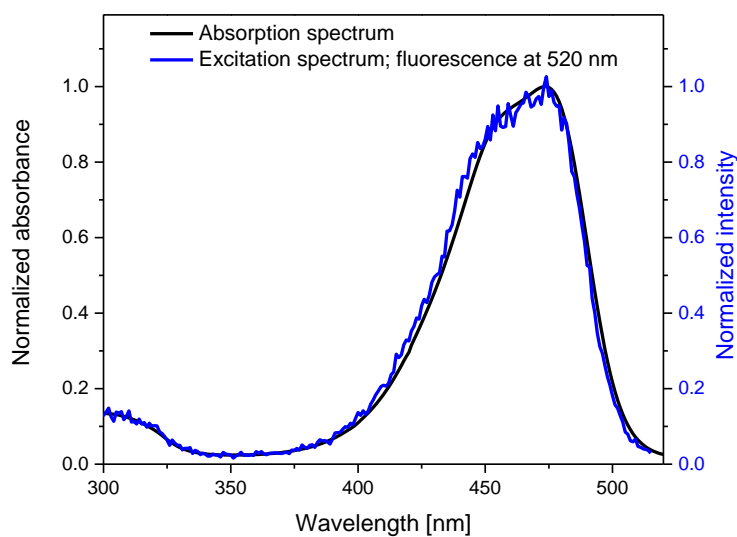

**Figure S2.** Contour plot of 3D fluorescence of miraxanthin V in water, recorded at right angle condition. (\*) shows a weak solvent Raman contribution (OH band at  $3400\text{ cm}^{-1}$ ).

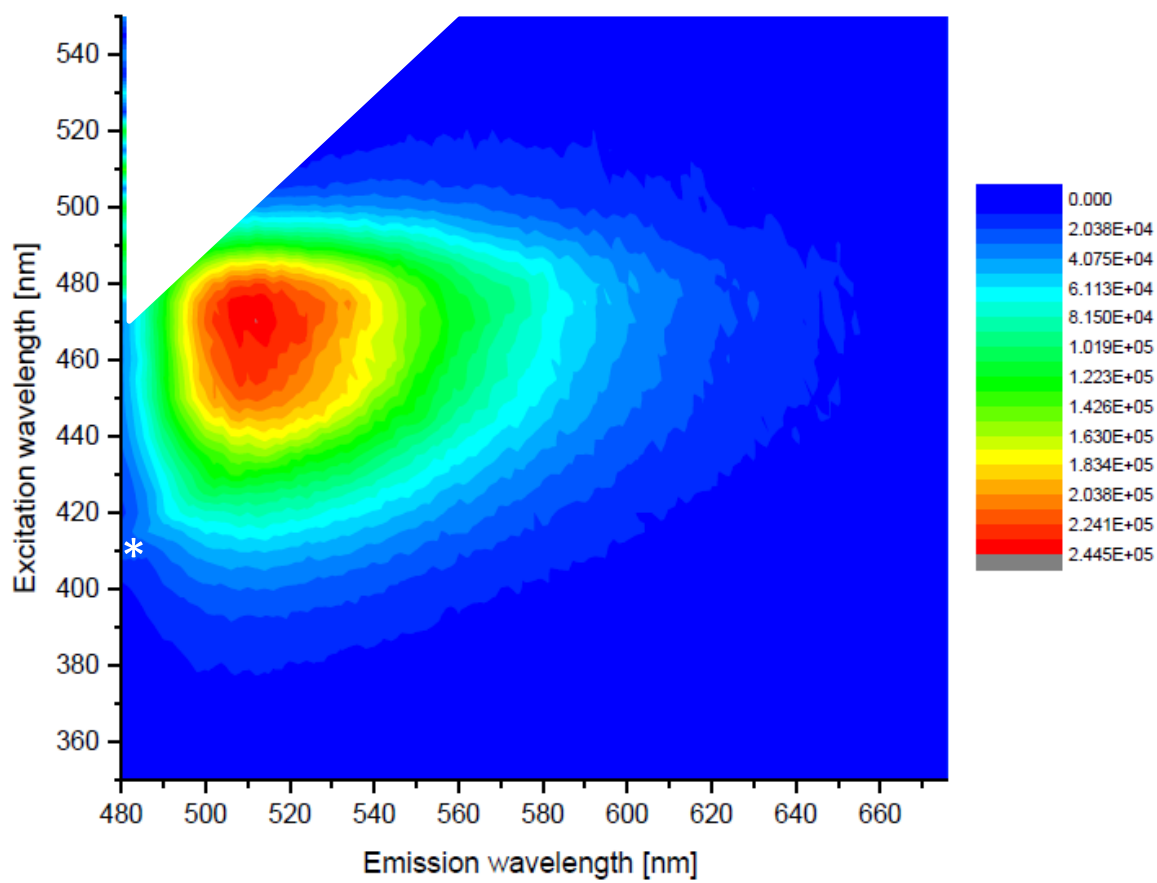

**Figure S3.** Effect of macroscopic solvent viscosity  $\eta$  on miraxanthin V fluorescence quantum yield  $\Phi_f$ . A linear fit was performed for the dependence between  $\ln(k_r/\Phi_f)$  and  $\ln(\eta)$ , as expected for a molecule with internal rotation in the excited state [Allen *et al.* Phys. Chem. Chem. Phys. 2005 (7) 3035]. The assumed value of radiative rate constant  $k_r$  is  $2.2 \times 10^8 \text{ s}^{-1}$ .

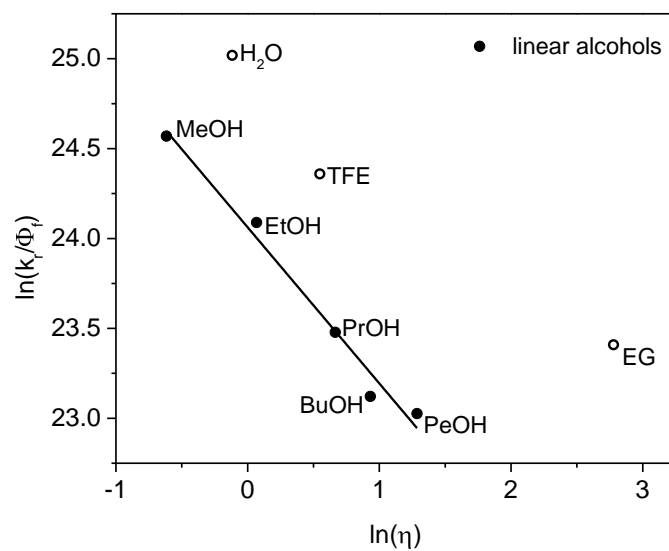

**Figure S4.** Normalized transient absorption spectra obtained for miraxanthin V in water ( $\lambda_{\text{exc}} = 480 \text{ nm}$ ).

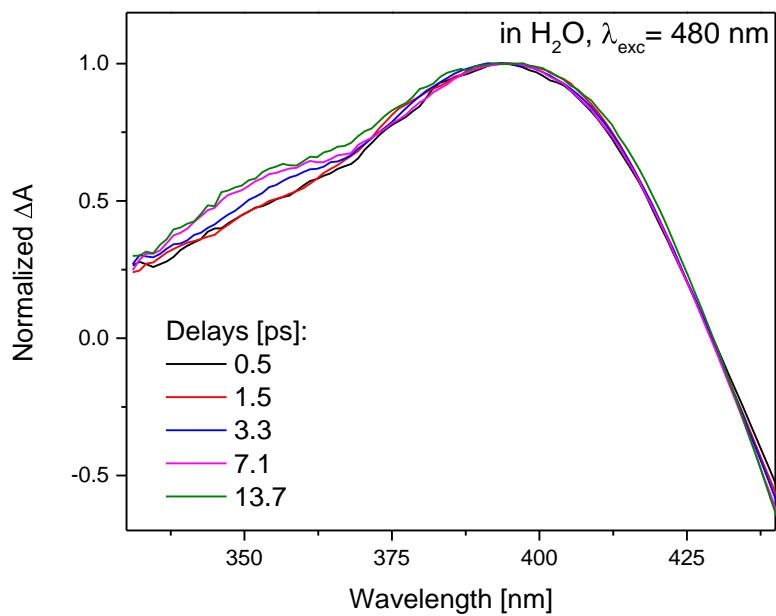

**Figure S5.** Band integral for miraxanthin V in water calculated over negative band (NBI), positive band (PBI) and both regions (EBI).

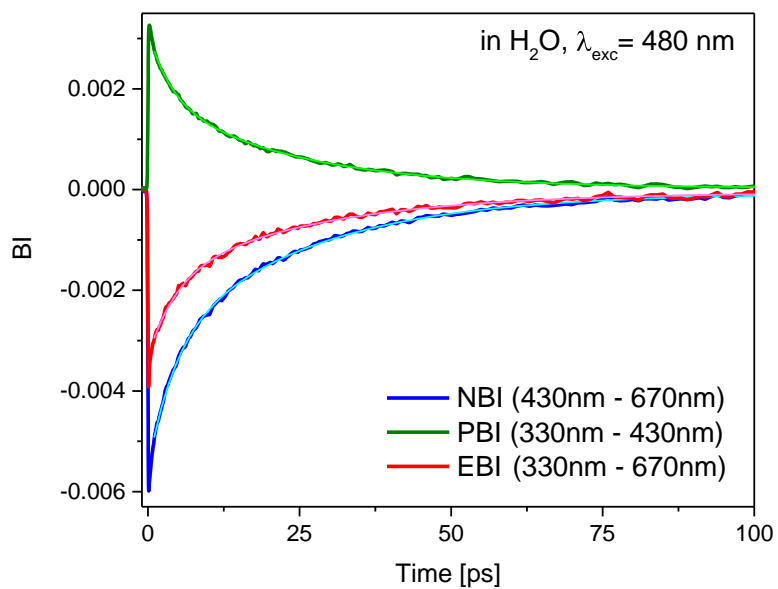

**Figure S6.** The relative amplitude  $A_1$  of the short component in band integral kinetics (negative BI in Table 2) versus solvent polarity  $\pi^*$ .

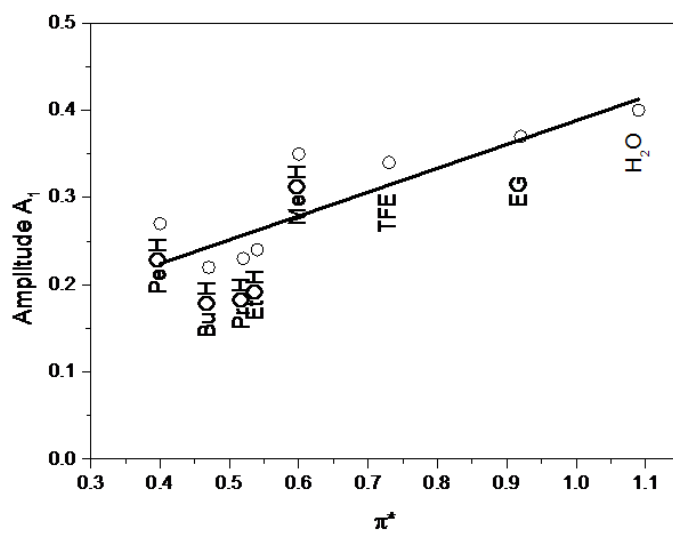

**Figure S7.** Transient absorption kinetic traces obtained for miraxanthin V in H<sub>2</sub>O ( $\lambda_{exc} = 480$  nm) at selected probe wavelengths. Fitting was performed with biexponential function

$$\Delta A = A_1 \exp(-t/\tau_1) + A_2 \exp(-t/\tau_2) + \text{offset}$$

convoluted with ~150 fs Gaussian IRF. Accuracy of the time-constant is  $\pm 15\%$ .

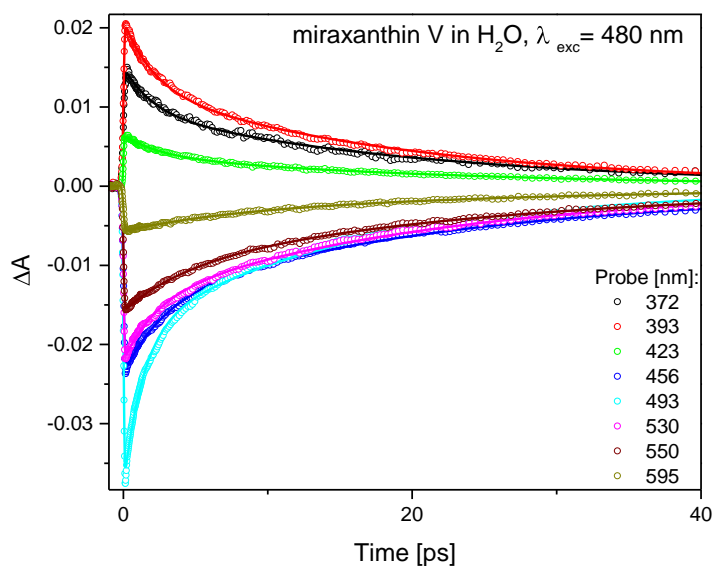

| Probe [nm] | A <sub>1</sub> | $\tau_1$ [ps] | A <sub>2</sub> | $\tau_2$ [ps] | Offset  |
|------------|----------------|---------------|----------------|---------------|---------|
| 372        | 0.0056         | 2.0           | 0.0094         | 20.2          | 0.0001  |
| 393        | 0.0083         | 2.1           | 0.0125         | 18.7          | 0.0002  |
| 423        | 0.0026         | 2.6           | 0.0039         | 22.9          | 0       |
| 456        | -0.0088        | 2.9           | -0.0142        | 21.5          | -0.0007 |
| 493        | -0.0197        | 1.35          | -0.0183        | 16.0          | -0.0002 |
| 530        | -0.0073        | 2.3           | -0.0145        | 20.8          | -0.0002 |
| 550        | -0.0051        | 4.3           | -0.0105        | 24.4          | -0.0001 |
| 595        | -0.0019        | 6.7           | -0.0038        | 26.5          | -0.0001 |

**Figure S8.** (A) NIR transient absorption spectra recorded in with excitation at 485 nm for miraxanthin V in water. (B) The determined decay-associated spectra with their respective time constants obtained by double-exponential global fit. (C) Two time constants  $\tau_1$  and  $\tau_2$  were obtained from double exponential fit of band integral: 2.7 ps (0.41) and 21.9 ps (0.59).

(A)

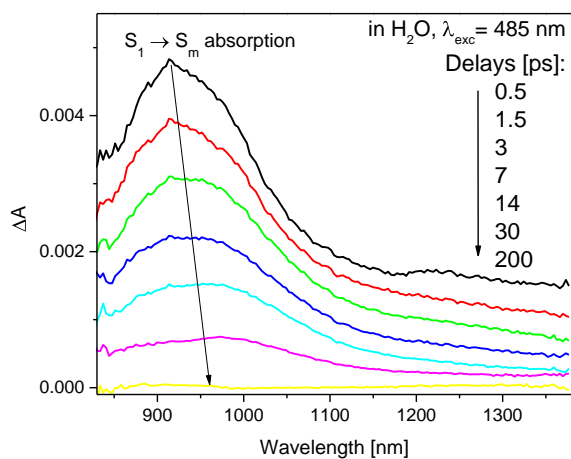

(B)

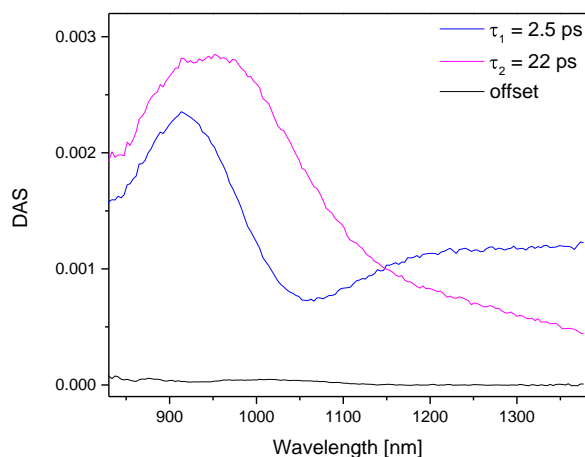

(C)

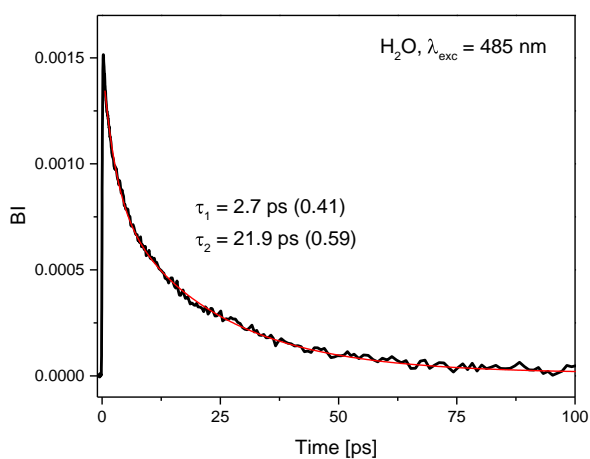



**Figure S9.** (A) NIR transient absorption spectra recorded with excitation at 485 nm for miraxanthin V in MeOH. (B) The determined decay-associated spectra with their respective time constants obtained by double-exponential global fit. (C) Two time constants  $\tau_1$  and  $\tau_2$  were obtained from double exponential fit of band integral: 5.1 ps (0.38) and 38.7 ps (0.62).

(A)

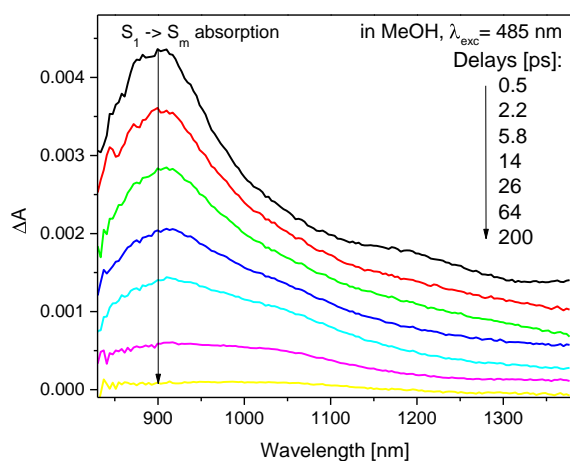

(B)

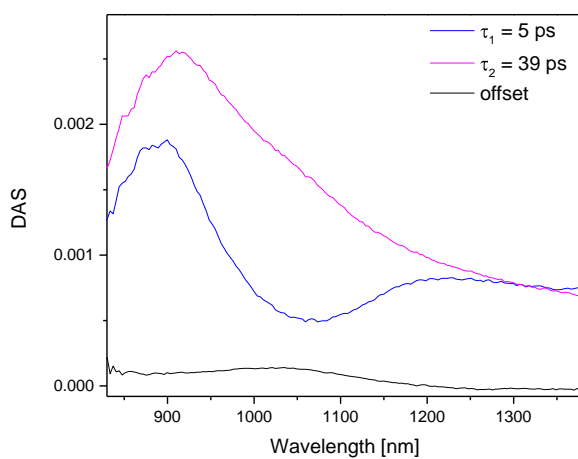

(C)

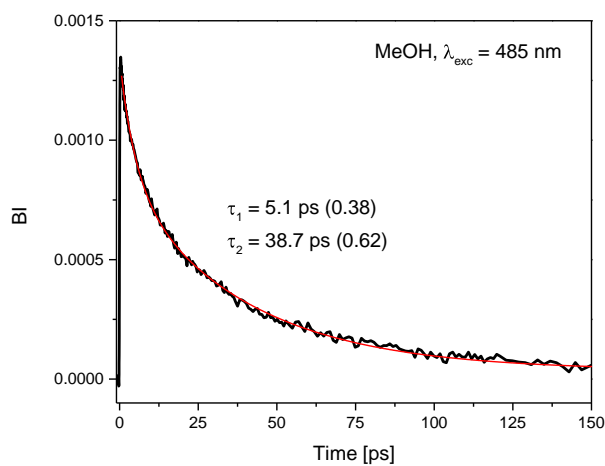

**Figure S10.** Dependence between miraxanthin V fluorescence quantum yield  $\Phi_F$  and time constant  $\tau_2$  in various solvents.

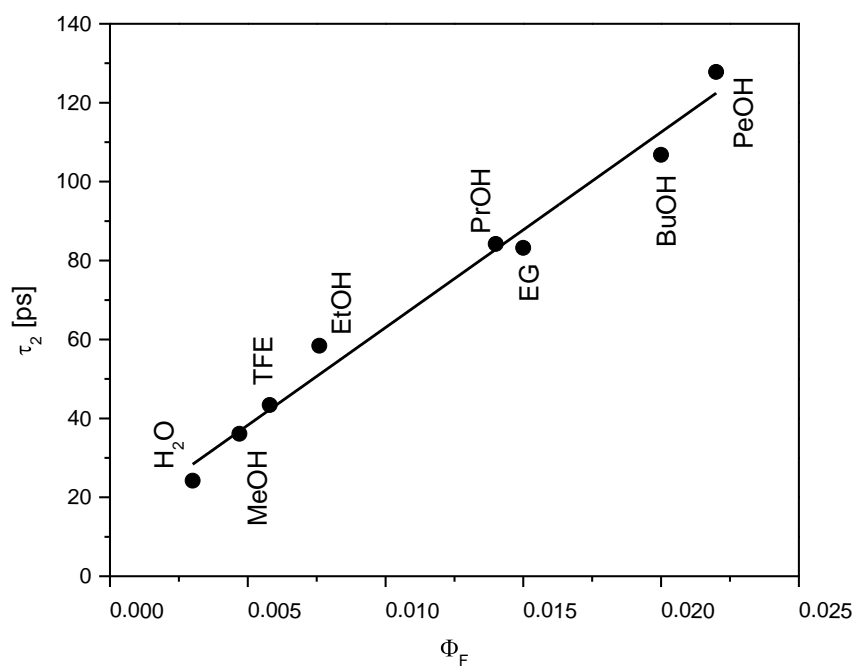

**Figure S11.** (A) Transient absorption spectra recorded with excitation at 298 nm for miraxanthin V in water. (B) Band Integral decays calculated over different bands. (C) The determined decay associated spectra with their respective time constants obtained by double-exponential global fit. (D) Obtained time constants and partial amplitudes. (E) Selected transient absorption kinetic traces at probe wavelengths 460 and 520 nm, normalized at delay of 5 ps, obtained with excitation at  $\lambda_{exc} = 298$  nm and  $\lambda_{exc} = 480$  nm.

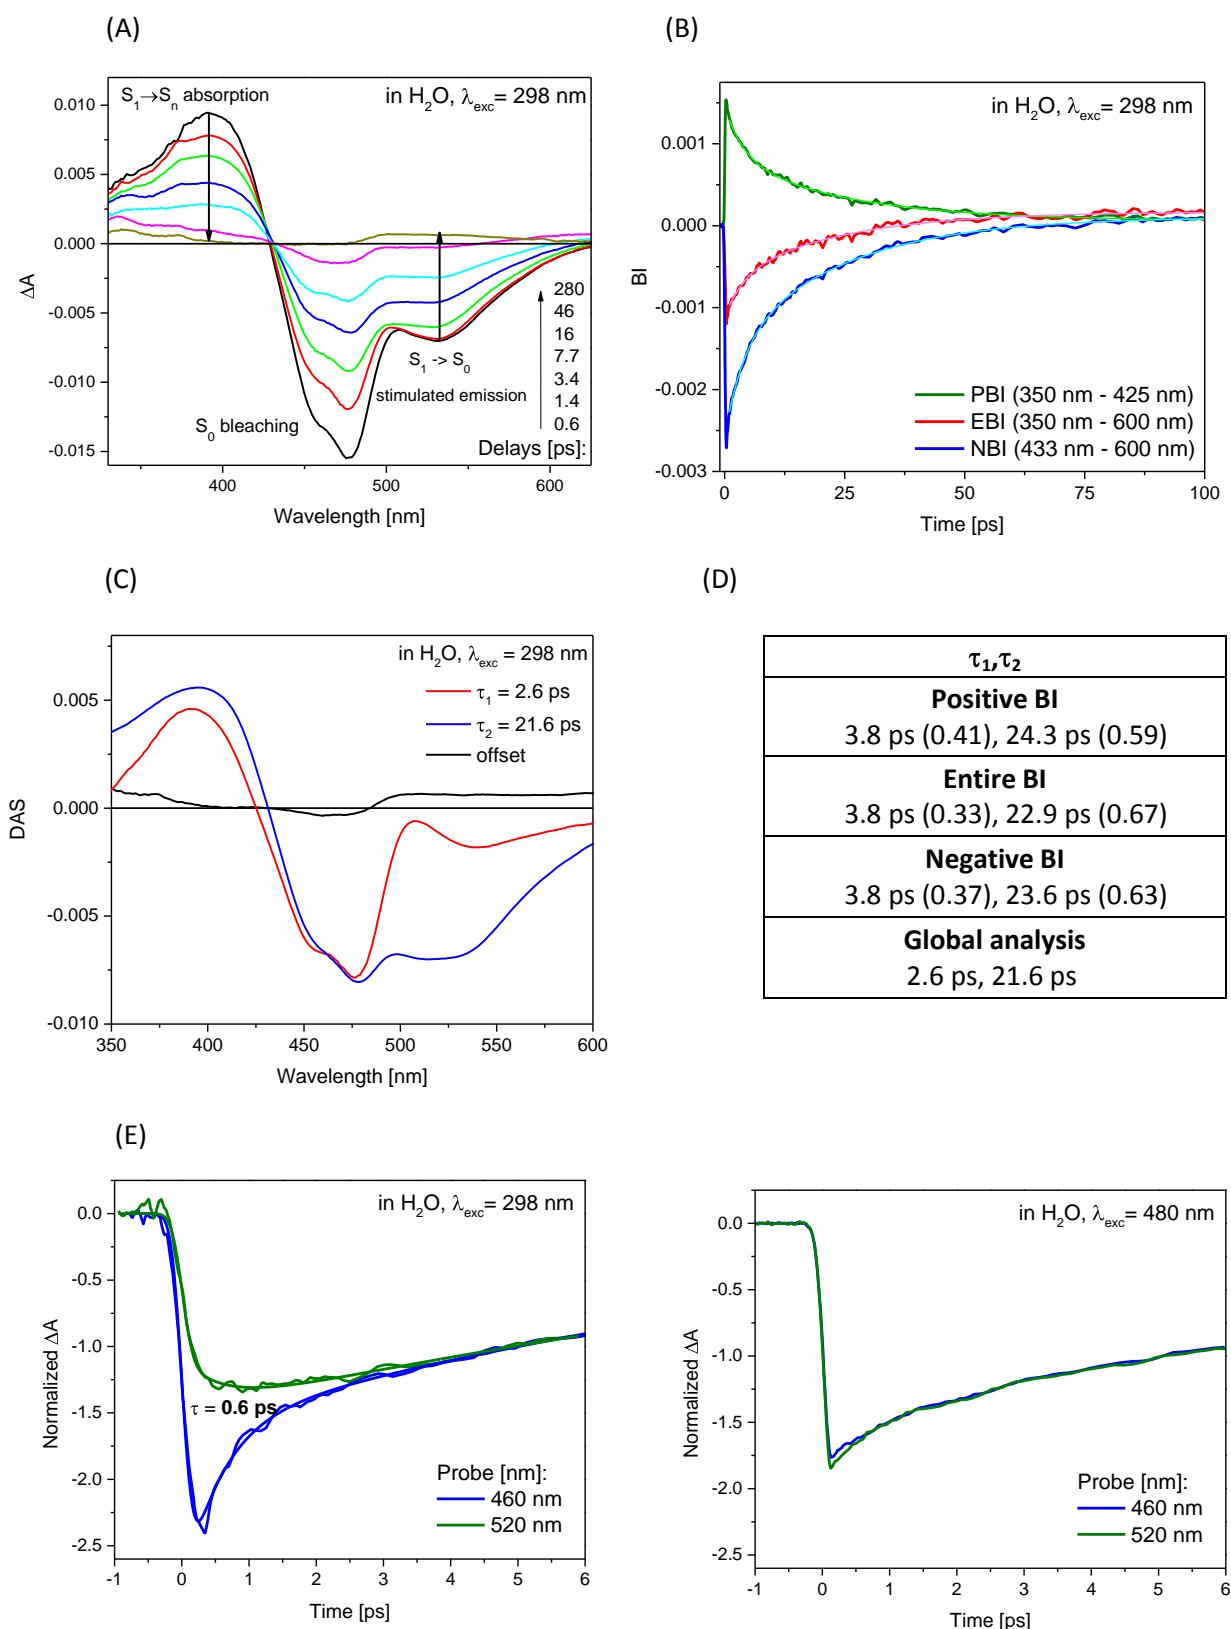

**Figure S12.** (A) UV-vis transient absorption spectra recorded with excitation at 480 nm for miraxanthin V in H<sub>2</sub>O, MeOH, EtOH, TFE, PrOH, BuOH, PeOH, and EG solutions. (B) The determined decay-associated spectra with their respective time constants obtained by double-exponential global fit. (C) Band integrals fitted by double-exponential function.

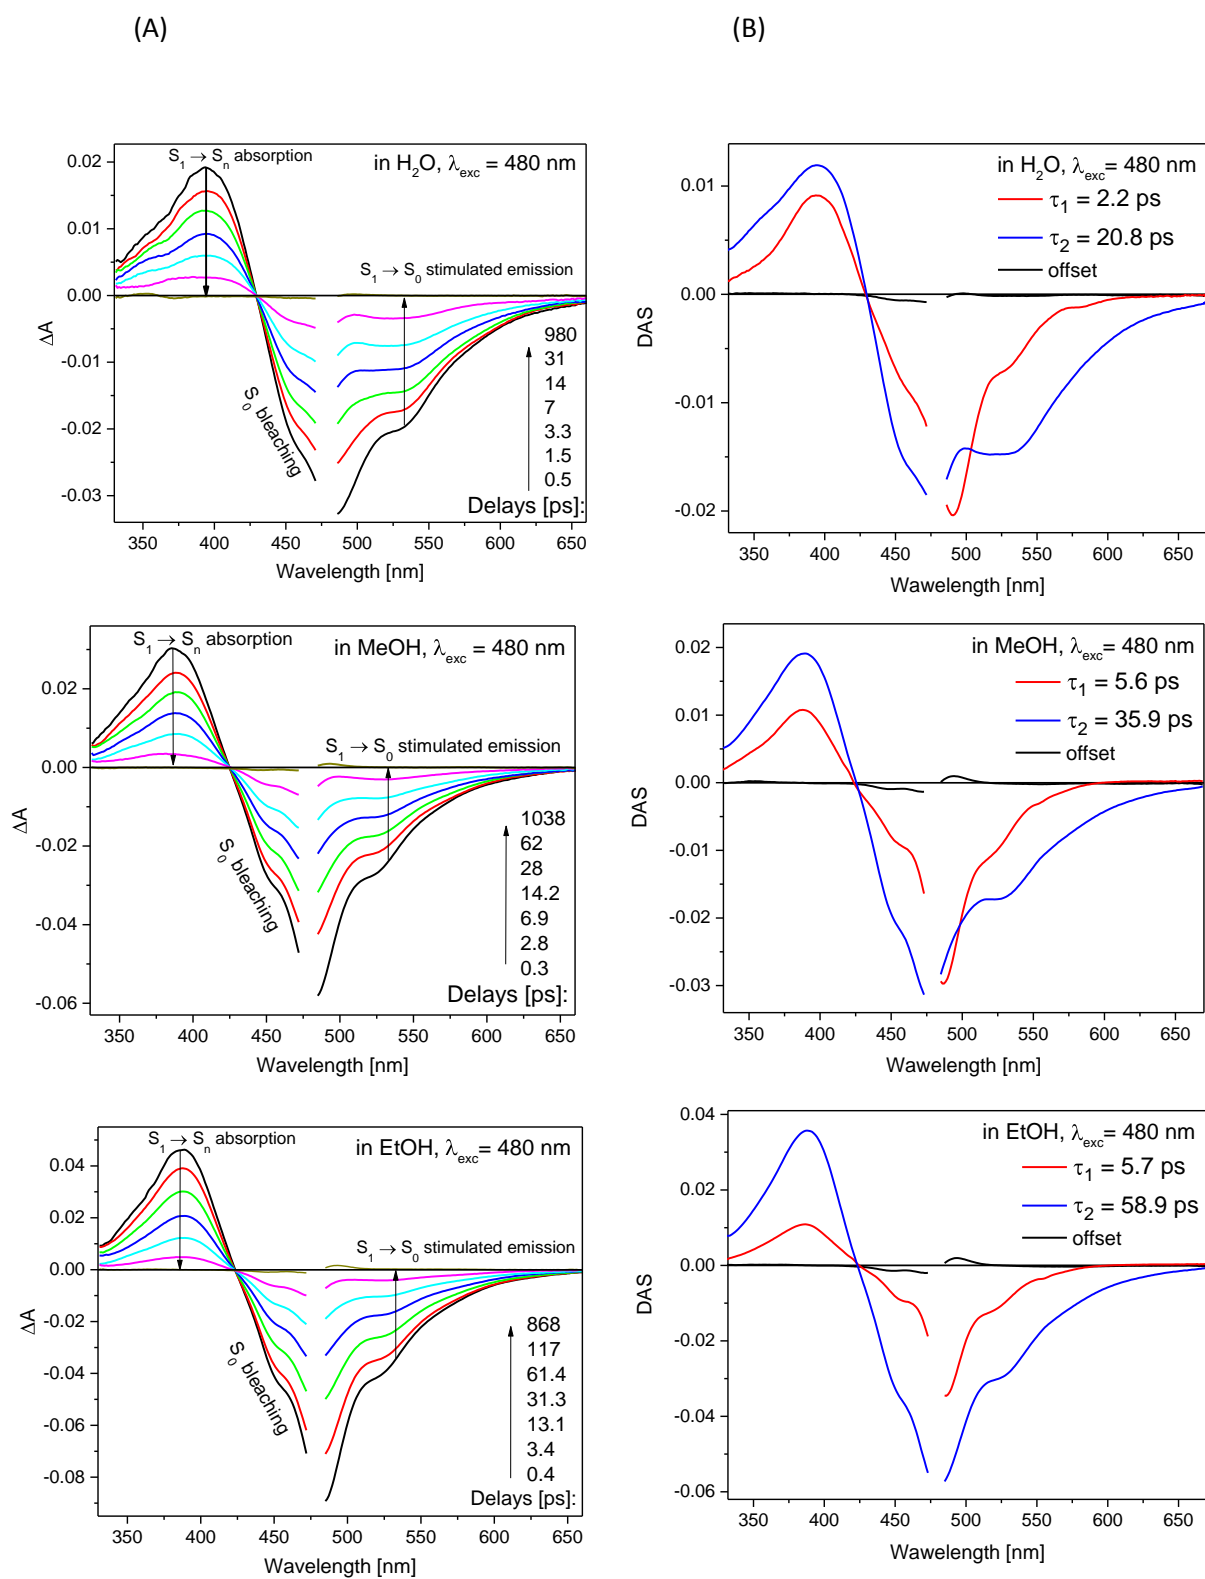

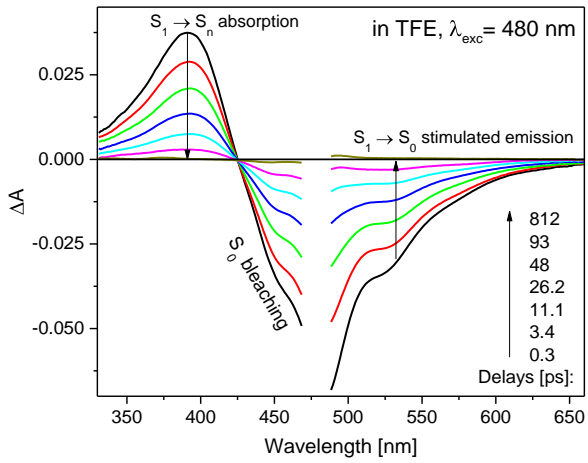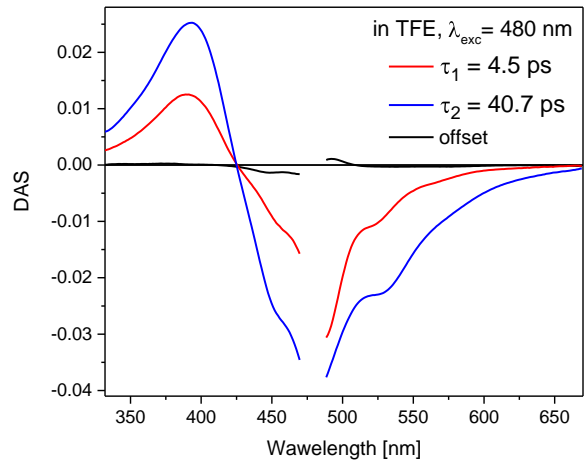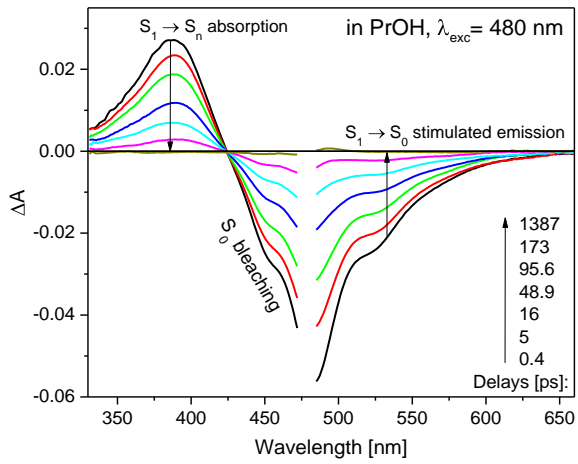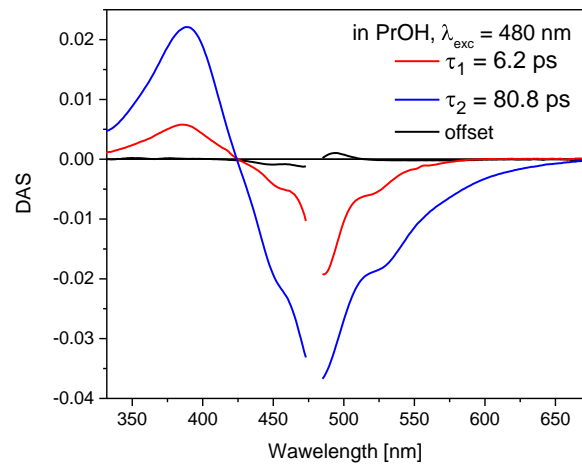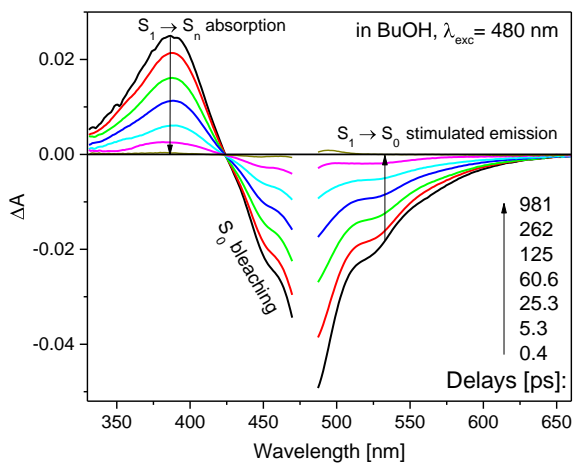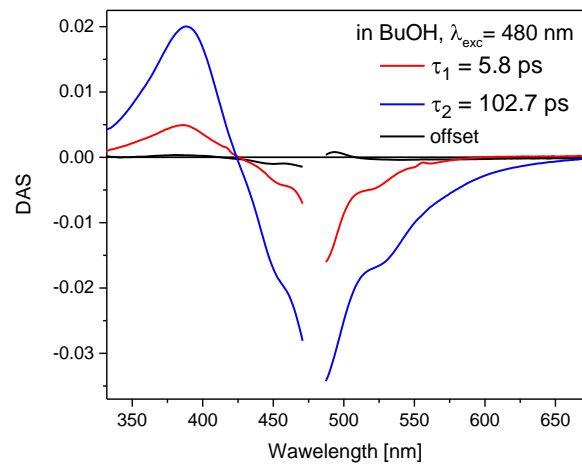

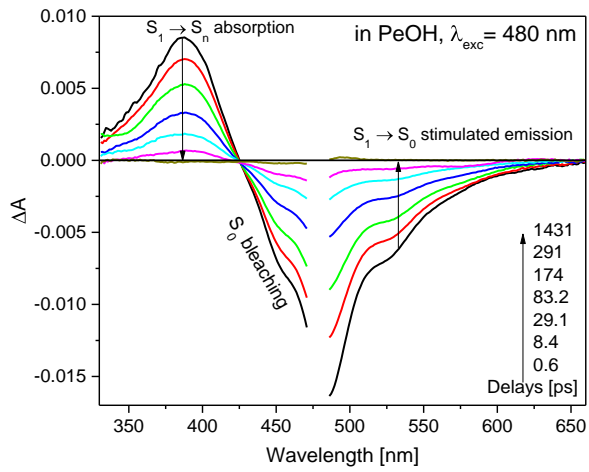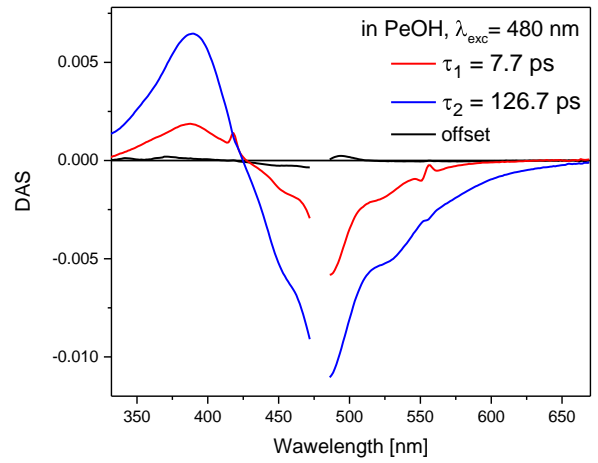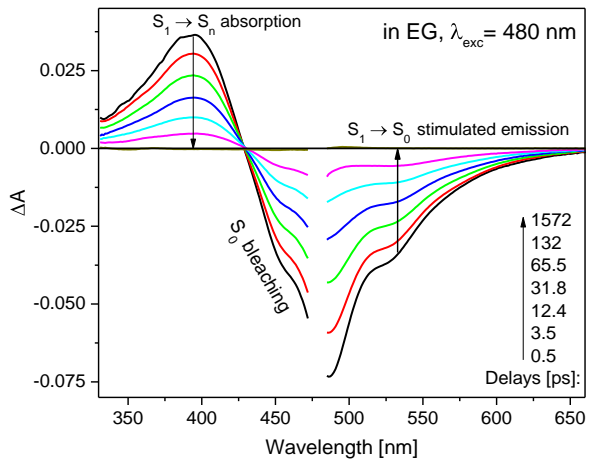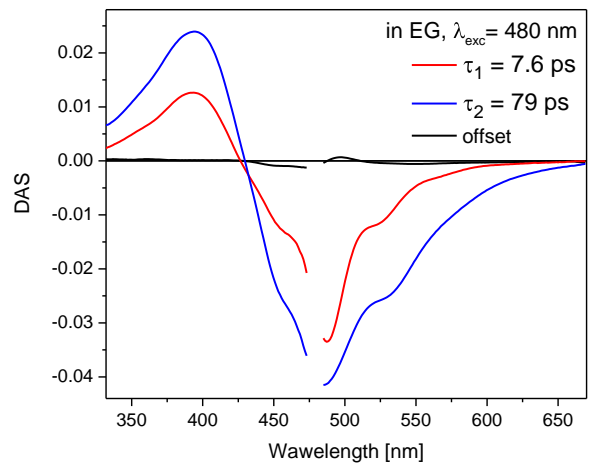

(C)

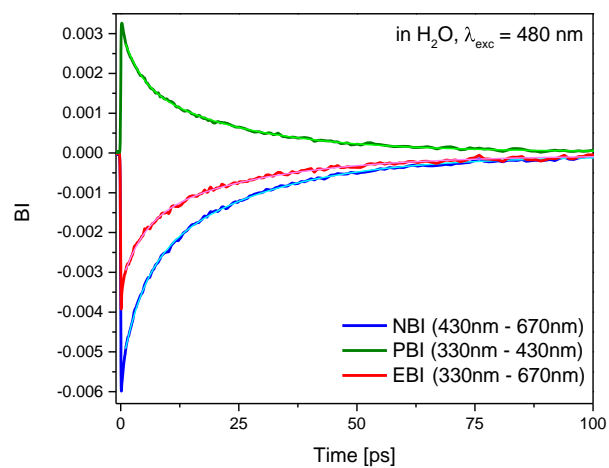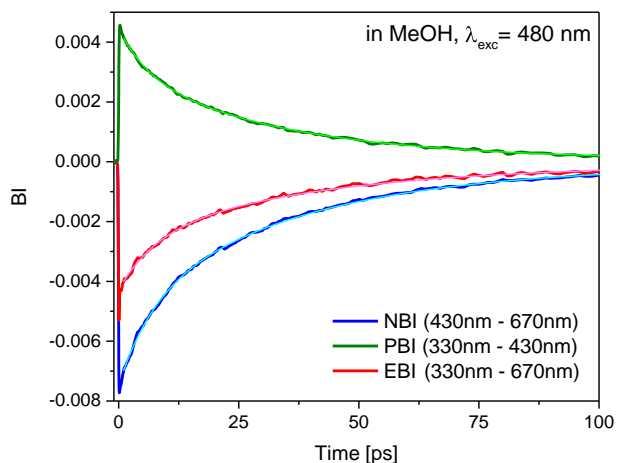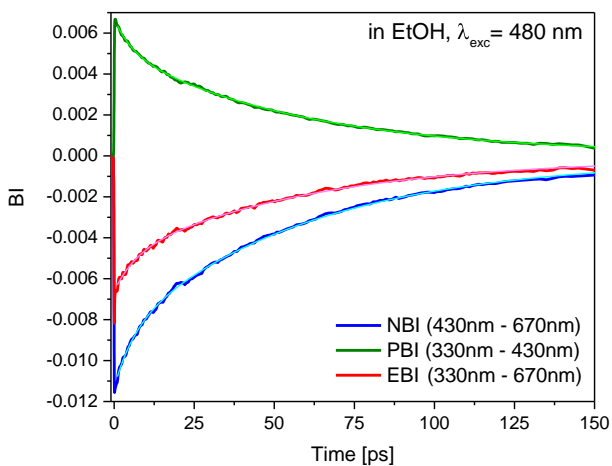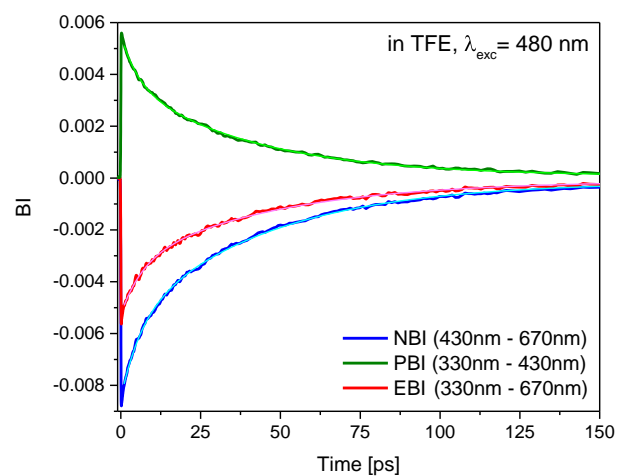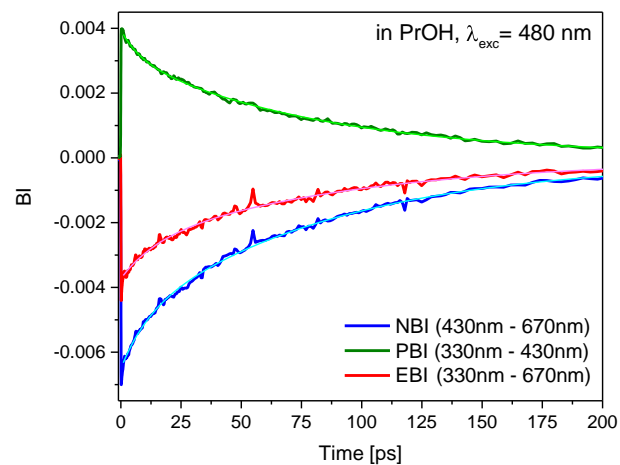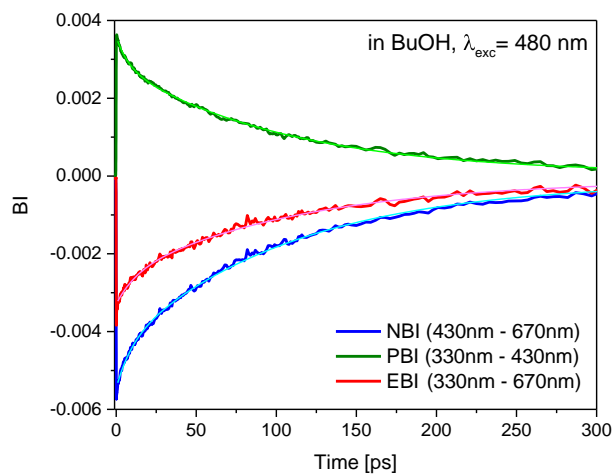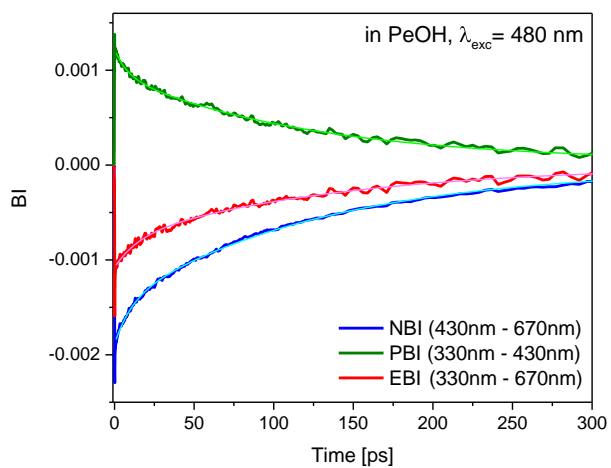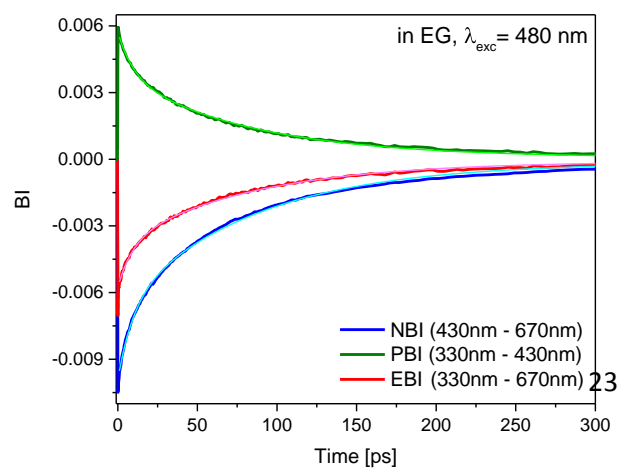

**Figure S13.** Dependence of miraxanthin V decay time constants on viscosity/temperature in methanolic solution.

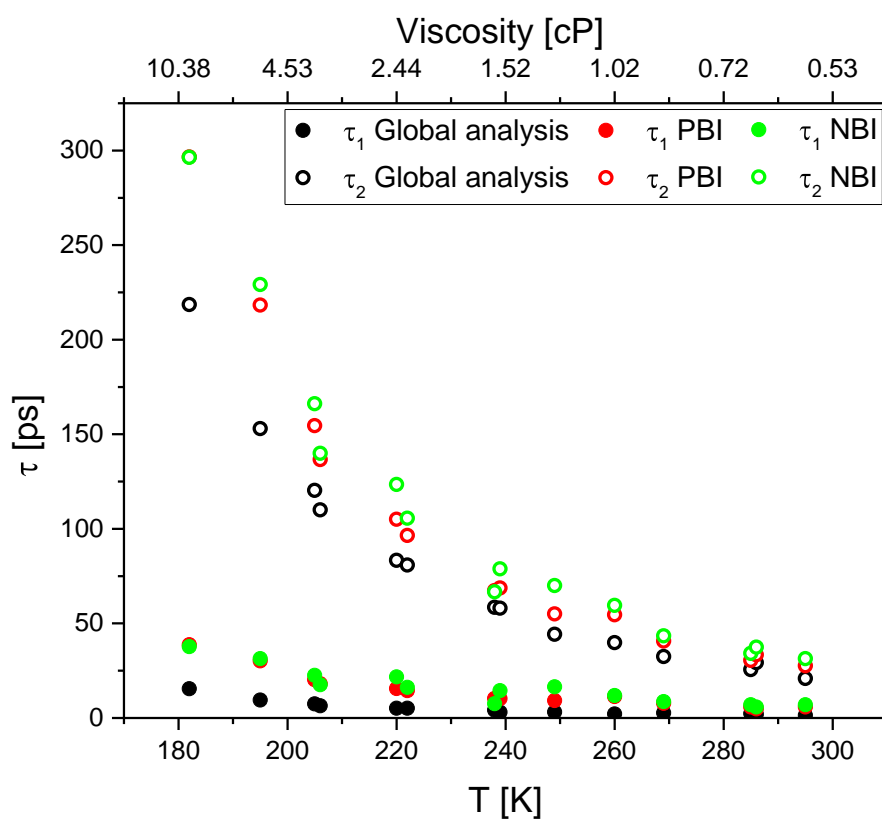



**Figure S14.** Surface fit for the dependence of the miraxanthin V S<sub>1</sub> decay rate vs. solvent viscosity and temperature.

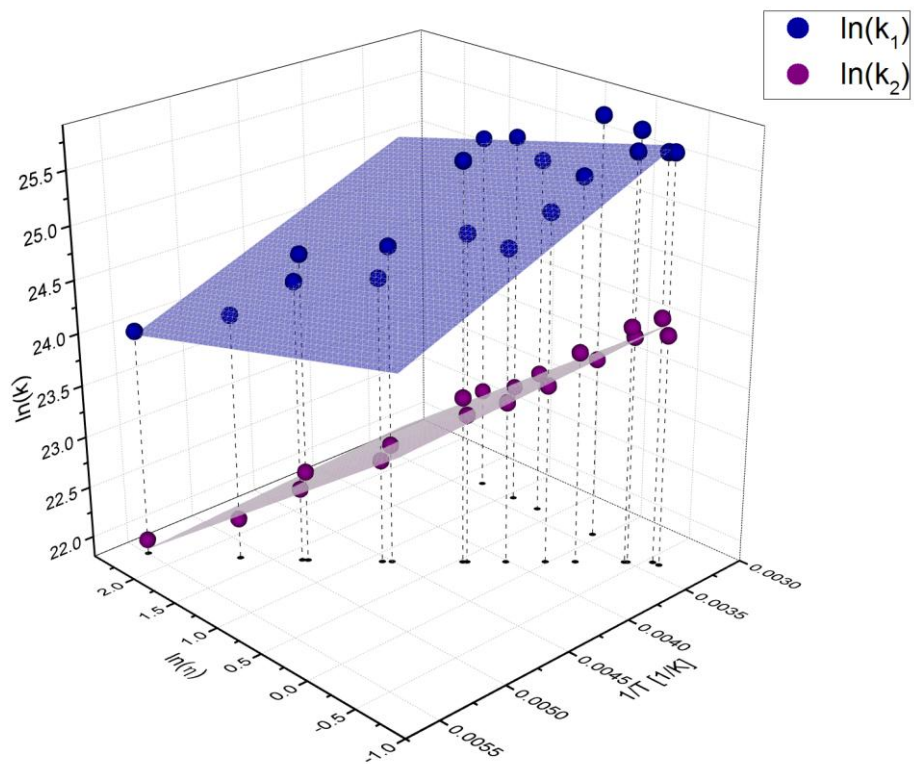

**Figure S15.** Equilibrium ground-state geometries of two stereoisomeric forms of miraxanthine V: *EE* and *ZE* optimized at the MP2/cc-pVDZ theory level.

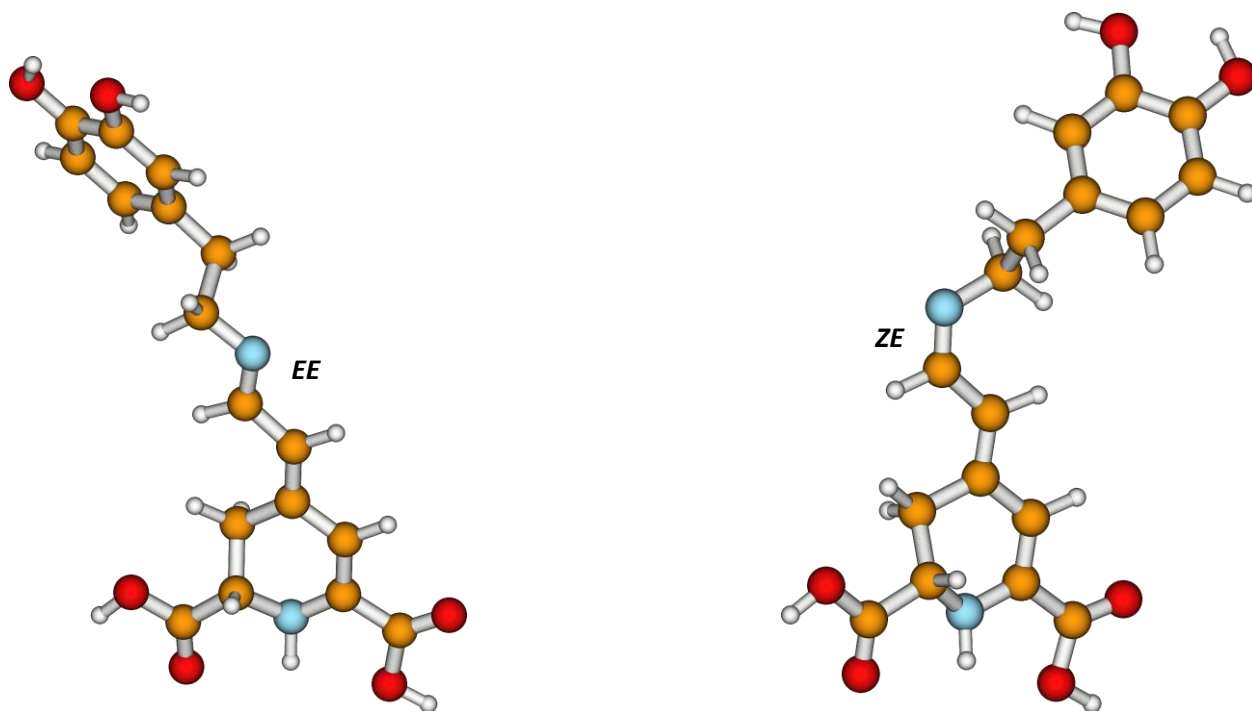

**Figure S16.** Potential-energy profiles of miraxanthin V in the  ${}^1\pi\pi^*$  (blue triangles) and  ${}^1n\pi^*$  (red squares) excited states determined at the ADC(2)/def-SV(P) level (MP2/def-SV(P) for the ground state) along the minimum energy path (solid line) in the vicinity of FC region of the *EE* and *ZE* stereoisomers.  $S_0^{(\pi\pi^*)}$  (empty triangles) denotes the energy of the ground state calculated along the minimum-energy path of the appropriate excited state (dashed curves). Fluorescence energy ( $E_{fl}$ ) was calculated at the ADC(2)/cc-pVDZ level.

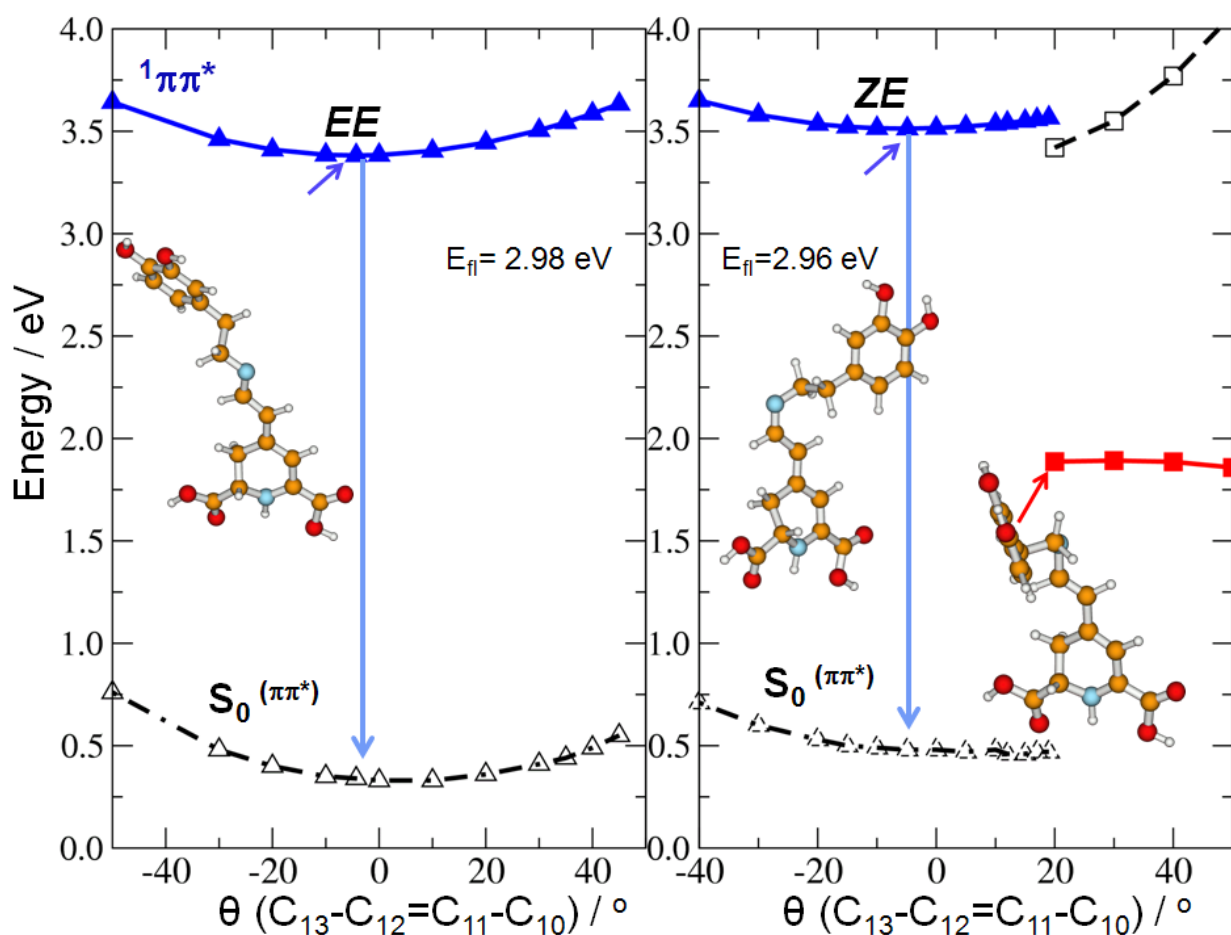

**Figure S17.** Potential-energy profiles of miraxanthin V in the  $^1\pi\pi^*$  (blue triangles) excited state determined at the ADC(2)/def-SV(P) level (MP2/def-SV(P) for the ground state) along the minimum energy path (solid line) in the vicinity of FC region of the *EE* stereoisomer.  $S_0^{(\pi\pi^*)}$  (empty triangles) denotes the energy of the ground state calculated along the minimum-energy path of the  $\pi\pi^*$  excited state (dashed curves). Fluorescence energy ( $E_{fl}$ ) was calculated at the ADC(2)/cc-pVDZ level.

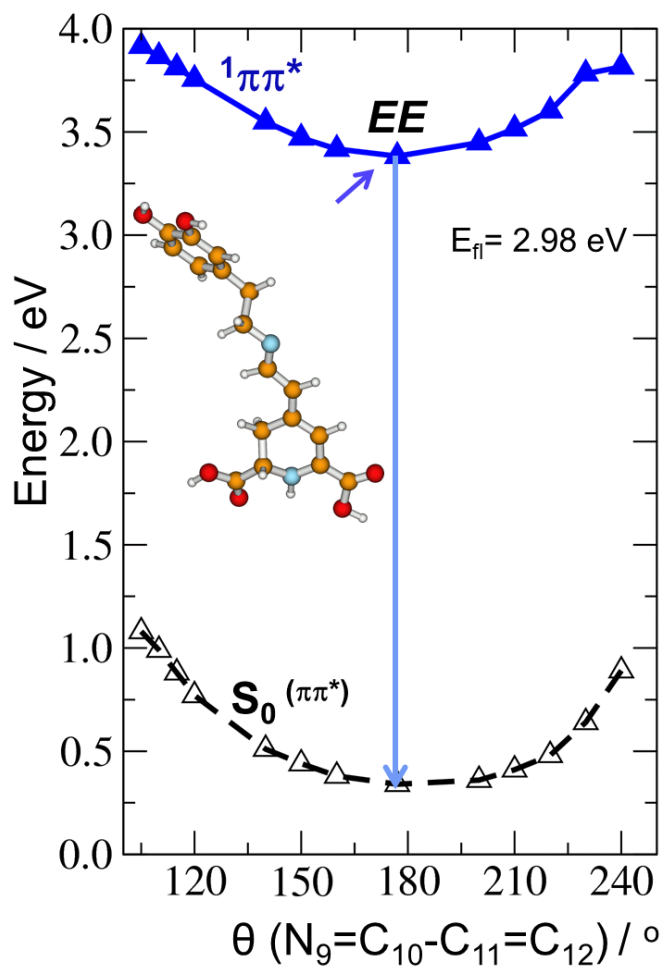

Supplement: c6ra28110a1.pdf [file c6ra28110a1.pdf]
